# Supplementary material for: Feasibility of circulating tumor DNA analysis in dogs with naturally occurring malignant and benign splenic lesions
Source: PubMed Central journal article supplement (PMC9012871; doi:10.1038/s41598-022-09716-6), 2022-04-15
Supplement: 41598_2022_9716_MOESM1_ESM.pdf [file 41598_2022_9716_MOESM1_ESM.pdf]

**Supplementary Materials for  
Feasibility of circulating tumor DNA analysis in dogs with naturally-occurring malignant and  
benign splenic lesions**

Patricia Filippesen Favaro, Samuel D. Stewart, Bradon R. McDonald, Jacob Cawley, Tania Contente-Cuomo, Shukmei Wong, William P.D. Hendricks, Jeffrey M. Trent, Chand Khanna\*, Muhammed Murtaza\*

\*Co-corresponding authors:

Muhammed Murtaza ([murtaza@surgery.wisc.edu](mailto:murtaza@surgery.wisc.edu))

Chand Khanna ([ckhanna@ethosvet.com](mailto:ckhanna@ethosvet.com))

| Healthy dog | cfDNA concentration<br>(pg per ml of plasma) | Modal cfDNA fragment size (base pairs) | cfDNA WGS coverage |
|-------------|----------------------------------------------|----------------------------------------|--------------------|
| 1           | 247.5                                        | 163                                    | 0.46               |
| 2           | 375.5                                        | 166                                    | 0.83               |
| 3           | 238.0                                        | 171                                    | 0.39               |
| 4           | 143.9                                        | 164                                    | 0.48               |
| 5           | 260.6                                        | 167                                    | 0.45               |
| 6           | 1448.9                                       | 165                                    | 0.30               |
| 7           | 310.7                                        | 153                                    | 0.33               |
| 8           | 151.2                                        | 171                                    | 0.45               |
| 9           | 349.5                                        | 170                                    | 0.42               |

**Table S1.** Description of cell free DNA concentration per mL of plasma and the respective modal fragment size and whole genome sequencing (WGS) coverage from the plasma of nine healthy dogs.

| Patient | Gender | Breed                                      | Age (years) | BW (kg) | Diagnosis | Survival (dps) | Pre-operative ctDNA conc. | First post-operative ctDNA conc. | Pre-operative ctDNA fraction | First post-operative ctDNA fraction | TF tumor biopsy | MT  |
|---------|--------|--------------------------------------------|-------------|---------|-----------|----------------|---------------------------|----------------------------------|------------------------------|-------------------------------------|-----------------|-----|
| 2       | Ms     | American Pit Bull                          | 6           | 40.4    | Benign A  | 192**          | 4.38                      | 0.19                             | 0.094                        | 0.063                               | 0               | No  |
| 3       | Ms     | Mix                                        | 10          | 25.1    | Benign A  | 3              | 1.06                      | na                               | 0                            | na                                  | 0               | No  |
| 5       | Ms     | Mix                                        | 12          | 35      | Benign A  | 369**          | 2.20                      | 0.47                             | 0                            | 0.092                               | 0               | No  |
| 6       | Fs     | Labrador Retriever                         | 5.83        | 30.9    | Benign A  | 376**          | 1.91                      | 0.15                             | 0                            | 0.049                               | 0               | No  |
| 7       | Ms     | Pointer mix                                | 9           | 39.1    | Benign A  | 740**          | 5.02                      | na                               | 0.043                        | na                                  | 0.11            | No  |
| 8       | Fs     | American Pit Bull Wirehaired Point Griffon | 7           | 38.5    | Benign A  | 388**          | 0.39                      | 0.02                             | 0.065                        | 0.031                               | 0.10            | No  |
| 9       | Ms     | Griffon                                    | 10.92       | 33      | Benign A  | 882**          | 64.47                     | na                               | 0.058                        | na                                  | 0.075           | No  |
| 10      | Fs     | English Bulldog                            | 10          | 25      | Benign A  | 581            | 0.28                      | 0.27                             | 0.043                        | 0                                   | 0.074           | No  |
| 11      | Fs     | Mix                                        | 11          | 13      | Benign A  | 363**          | 35.85                     | 0.33                             | 0.054                        | 0.054                               | 0               | No  |
| 12      | Ms     | Jack Russel Terrier                        | 13          | 10      | Benign C  | 389**          | 0.54                      | 0.49                             | 0                            | 0                                   | 0.10            | No  |
| 13      | Fs     | Corgi                                      | 14          | 11.3    | Sarcoma   | 382            | 15.75                     | 0.72                             | 0.070                        | 0.28                                | 0.33            | No  |
| 15      | Fs     | Labrador Retriever                         | 11          | 63.4    | Benign B  | 267            | 0.17                      | na                               | 0                            | na                                  | 0               | No  |
| 16      | Ms     | Standard Poodle                            | 14          | 24.9    | HSA I     | 50             | 0.71                      | 0.35                             | 0.066                        | 0.10                                | 0.28            | No  |
| 17      | Fs     | Wheaten Terrier                            | 11          | 20.6    | HSA I     | 148            | 4.77                      | na                               | 0.058                        | na                                  | 0.14            | No  |
| 19      | Fs     | Labrador Retriever                         | 11          | 28.2    | HSA II    | 111*           | 0.22                      | 1.04                             | 0.13                         | 0                                   | 0               | Yes |
| 20      | Ms     | Labradoodle                                | 9           | 33.2    | HSA II    | 15             | 10.47                     | na                               | 0.13                         | na                                  | 0               | No  |
| 21      | Fs     | Labrador Retriever                         | 10          | 24.3    | HSA II    | 2              | 4.26                      | 0.09                             | 0.056                        | 0                                   | 0.078           | No  |
| 22      | M      | Goldendoodle                               | 12          | 55.6    | HSA II    | 121            | 0.16                      | 0.37                             | 0.050                        | 0.11                                | 0.055           | No  |
| 23      | Fs     | German Shepherd                            | 11          | 36.2    | HSA II    | 36             | 2.41                      | 0.30                             | 0.083                        | 0                                   | 0               | No  |
| 25      | M      | Great Dane                                 | 7.83        | 60      | HSA II    | 77             | 1.23                      | 0.21                             | 0.055                        | 0                                   | 0.13            | Yes |
| 26      | Ms     | Mix                                        | 11          | 32      | HSA II    | 19             | 0.92                      | 1.84                             | 0.20                         | 0.26                                | 0.097           | Yes |
| 27      | Ms     | Boxer mix                                  | 6           | 37      | HSA II    | 204            | 2.15                      | 0.89                             | 0.062                        | 0                                   | 0               | No  |
| 28      | Fs     | German Shepherd                            | 12          | 37.8    | HSA II    | 3              | 35.93                     | na                               | 0.32                         | na                                  | 0.091           | Yes |
| 29      | Fs     | Boxer                                      | 7           | 28      | HSA II    | 366**          | 175.80                    | 1.28                             | 0.056                        | 0.044                               | 0.16            | No  |
| 30      | Ms     | English Setter Yorkshire Terrier           | 11          | 26      | HSA III   | 0              | 0.08                      | na                               | 0                            | na                                  | 0               | Yes |
| 33      | Ms     | Mix                                        | 8.25        | 6.8     | HSA III   | 61             | 21.25                     | 3.43                             | 0.094                        | 0.063                               | 0.25            | Yes |
| 34      | Fs     | Mix                                        | 9           | 18.4    | HSA III   | 40             | 0.60                      | 2.97                             | 0.35                         | 0                                   | 0.20            | Yes |

|    |    |                  |    |      |         |     |       |        |       |       |      |     |
|----|----|------------------|----|------|---------|-----|-------|--------|-------|-------|------|-----|
| 35 | Fs | Mix              | 11 | 21   | HSA III | 92  | 9.31  | 422.79 | 0.036 | 0.081 | 0.13 | No  |
| 36 | Fs | Mix              | 12 | 38   | HSA III | 195 | 0.85  | 0.09   | 0.22  | 0.25  | 0    | No  |
| 37 | Ms | Husky            | 10 | 33.5 | HSA III | 0   | 87.74 | na     | 0.085 | na    | 0    | Yes |
| 38 | M  | Golden Retriever | 11 | 34.6 | HSA III | 18  | 28.43 | 0.02   | 0.066 | 0     | N/A  | Yes |
| 39 | Fs | Mix              | 12 | 22.3 | Sarcoma | 794 | 23.57 | 1.15   | 0.20  | 0     | 0    | No  |

**Table S2.** Description of the patients included in the baseline peri-operative cohort, with the respective diagnostic, cell-free DNA concentrations and tumor fractions. M = male intact; Ms = male sterilized; Fs = female sterilized; dps = days post-surgery; na = not applicable; cfDNA conc = cell-free DNA concentration (ng) per mL of plasma; TF cfDNA = tumor fraction in plasma cell free DNA; TF tumor biopsy = ichor tumor fraction in tissue tumor biopsy; BW = bodyweight (Kg) at the time of surgery; MT = metastasis identified during peri-operative period; Benign A = Benign Complex Nodular Hyperplasia; Benign B= Myelolipoma; Benign C = Benign Complex Hyperplasia and Hematoma; \* = last day seen; \*\* = alive at last day of study.
